# Supplementary material
Source: publisher site journal article supplement (https://www.dovepress.com/article/517646)

Tables

Table S1 Univariate Logistic Regression for Pre-operative Aortic Rupture.

| Factors | Estimate | p-value | OR | 95%CI-lower | 95%CI-upper |
| --- | --- | --- | --- | --- | --- |
| Folic acid (continuous) | 0.0790 | 0.0013 | 1.08 | 1.03 | 1.14 |
| Folic acid (ordinal) | 0.3934 | 0.0032 | 1.48 | 1.15 | 1.94 |
| ＜6*reference |  |  | 1 |  |  |
| 6-9 | 0.0561 | 0.9084 | 1.06 | 0.41 | 2.75 |
| 9-13 | 0.7011 | 0.1226 | 2.02 | 0.83 | 4.91 |
| ≥13 | 1.0400 | 0.0155 | 2.83 | 1.22 | 6.57 |
| Homocysteine | 0.0066 | 0.6898 | 1.01 | 0.96 | 1.04 |
| Red blood cell count | -0.3230 | 0.0787 | 0.72 | 0.51 | 1.04 |
| Hematocrit | -3.0423 | 0.1910 | 0.05 | 0.00 | 5.06 |
| Hemoglobin | -0.0109 | 0.0872 | 0.99 | 0.98 | 1.00 |
| RDW-SD | 0.0800 | 0.0101 | 1.08 | 1.02 | 1.15 |
| White blood cell count | 0.1458 | <0.0001 | 1.16 | 1.09 | 1.23 |
| Neutrophil | 0.1586 | <0.0001 | 1.17 | 1.10 | 1.25 |
| Lymphocyte | -0.3183 | 0.2202 | 0.73 | 0.43 | 1.18 |
| Platelet | -0.0030 | 0.1188 | 1.00 | 0.99 | 1.00 |
| Serum creatinine, | 0.0014 | 0.1562 | 1.00 | 1.00 | 1.00 |
| Serum potassium, mmol/L | 1.1141 | <0.0001 | 3.05 | 2.01 | 4.70 |
| Serum sodium, mmol/L | 0.0136 | 0.7625 | 1.01 | 0.93 | 1.11 |
| Serum calcium, mmol/L | -2.7080 | 0.0059 | 0.07 | 0.01 | 0.47 |
| RBG | 0.1234 | 0.0027 | 1.13 | 1.05 | 1.23 |
| Total cholesterol | -0.1661 | 0.1923 | 0.85 | 0.66 | 1.08 |
| Triglyceride | -0.2877 | 0.1805 | 0.75 | 0.47 | 1.05 |
| LDL-C | -0.2157 | 0.2241 | 0.81 | 0.56 | 1.13 |
| HDL-C | -0.9625 | 0.0837 | 0.38 | 0.12 | 1.11 |
| Female | 0.3530 | 0.2800 | 1.42 | 0.75 | 2.70 |
| Age | 0.0028 | 0.793 | 1.00 | 0.98 | 1.02 |
| AD | 0.0133 | 0.9800 | 1.01 | 0.35 | 2.94 |
| AD of Stanford type A | 1.6844 | <0.0001 | 5.39 | 2.40 | 12.11 |

*As reference. OR, odds ratio; CI, confidence interval; RDW-SD, red cell distribution width – standard deviation; RBG, Random blood glucose; LDL-C, low-density lipoprotein cholesterol; HDL-C, high-density lipoprotein cholesterol; AD, aortic dissection.

Table S2 Pre-operative Adverse Events between Male and Female.

| Outcomes | Male  N=512 | | Female  N=127 | | p-value |
| --- | --- | --- | --- | --- | --- |
| Death/withdrawal of treatment | 121 | 23.63% | 33 | 25.98% | 0.5792 |
| Death | 38 | 7.42% | 14 | 11.02% | 0.1839 |
| Withdrawal of treatment | 94 | 18.36% | 24 | 18.90% | 0.8887 |
| Aortic Rupture | 41 | 8.01% | 14 | 11.02% | 0.2781 |
| Infection | 129 | 25.20% | 22 | 17.32% | 0.0616 |
| MODS | 14 | 2.73% | 1 | 0.79% | 0.3321 |
| Bleeding | 25 | 4.88% | 3 | 2.36% | 0.2142 |
| RRT | 51 | 9.96% | 9 | 7.09% | 0.3202 |
| Liver dysfunction | 37 | 7.23% | 9 | 7.09% | 0.9564 |
| Heart failure | 15 | 2.93% | 4 | 3.15% | 1 |
| Respiratory failure | 42 | 8.20% | 4 | 3.15% | 0.0486 |
| Mechanical ventilation | 34 | 6.64% | 5 | 3.94% | 0.2509 |
| Acute myocardial infarction | 9 | 1.76% | 3 | 2.36% | 0.9331 |
| Ischemic stroke | 29 | 5.66% | 2 | 1.57% | 0.0566 |
| Composite adverse events | 263 | 51.37% | 51 | 40.16% | 0.0237 |
| Open surgery | 201 | 39.26% | 51 | 40.16% | 0.8527 |
| EVAR | 94 | 18.36% | 17 | 13.39% | 0.1854 |
| Admitted for intervention/surgery | 283 | 55.27% | 67 | 52.76% | 0.6099 |

MODS, Multiple Organ Dysfunction Syndrome; RRT, renal replacement treatment; EVAR, endovascular aneurysm repair.

Figure S1 Scatter Plot and Fitting Curve of Folic Acid and Homocysteine (Blue Dot: Female; Black Dot: Male)


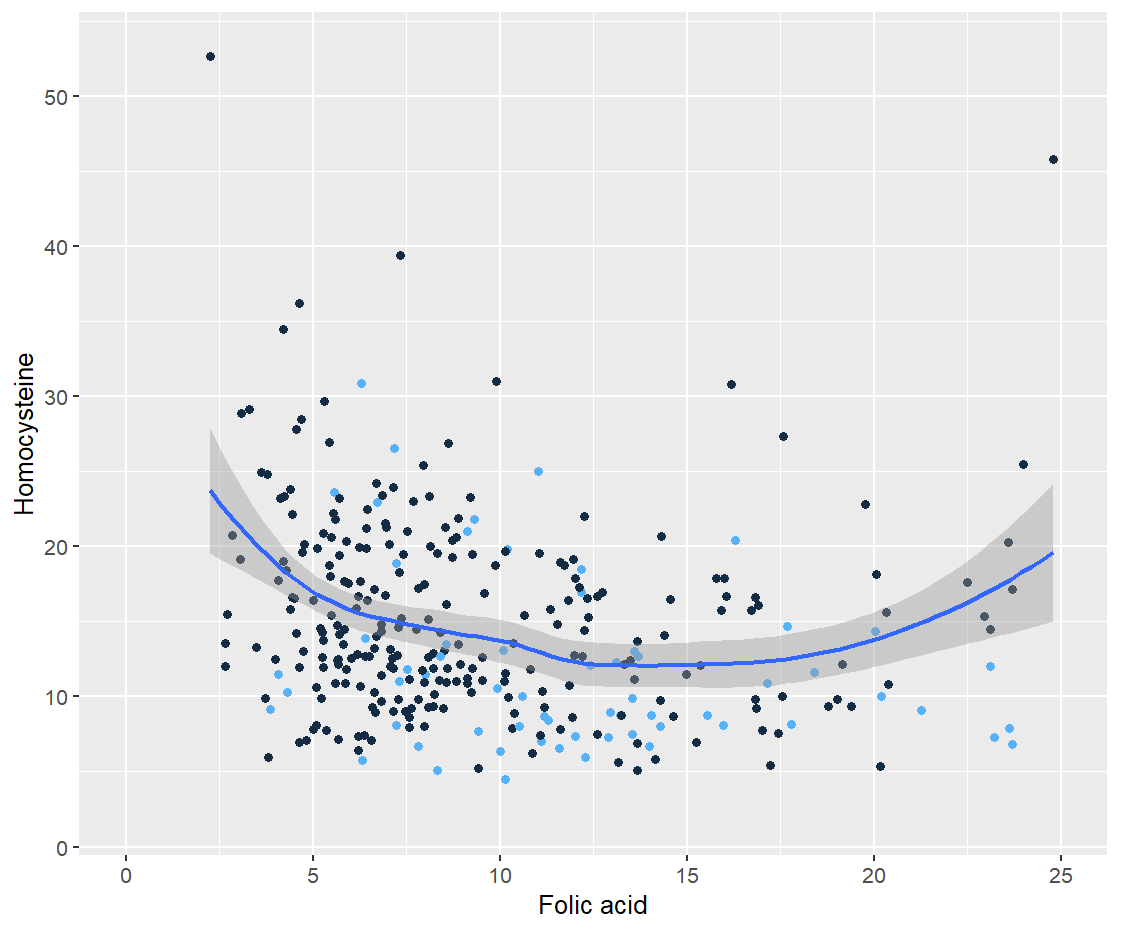

Supplement: Supplementary file 1 [file 517646-Supplementary-Material.docx]
